# Supplementary material
Source: publisher site journal article supplement (https://www.dovepress.com/article/336404)
Supplement: Supplementary file 1 [file get_supplementary_file.php]

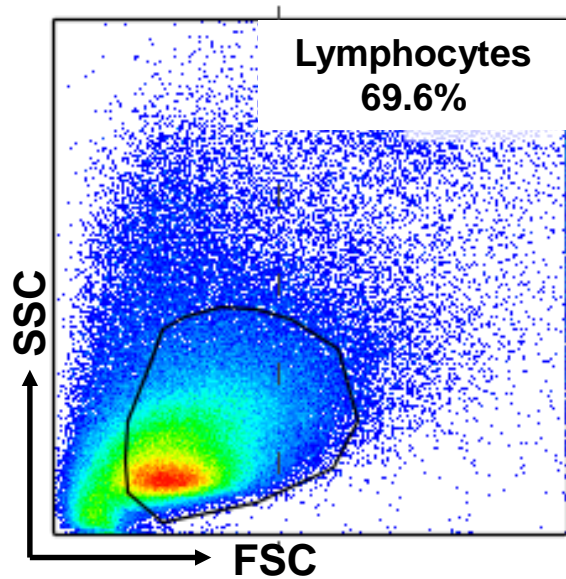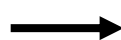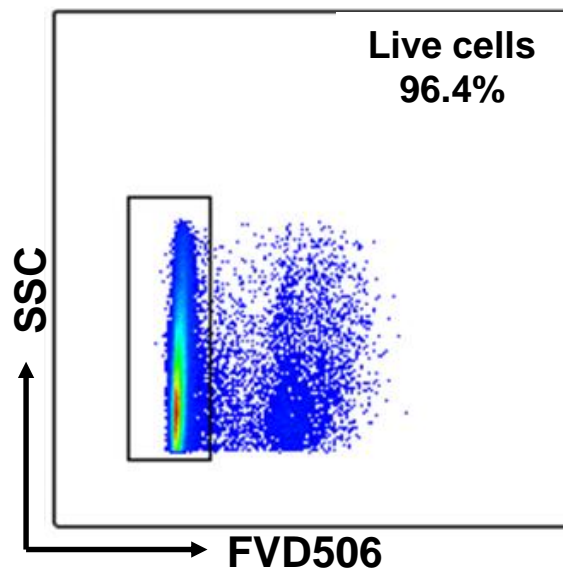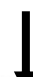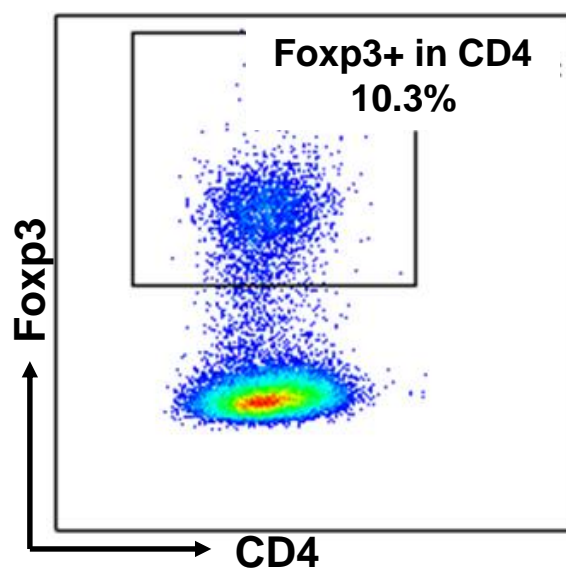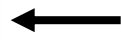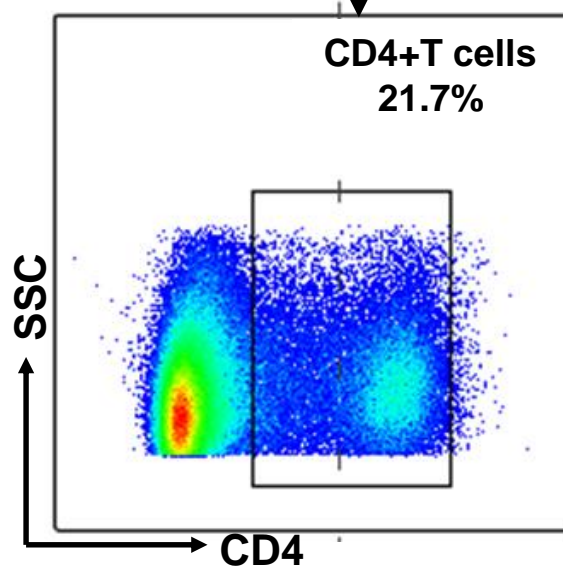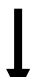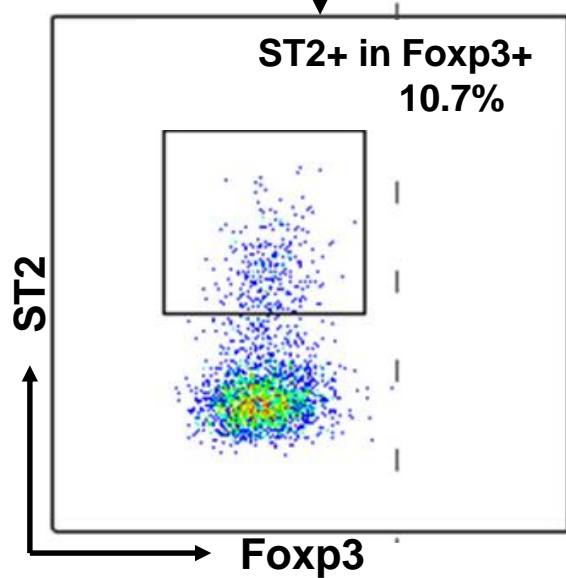

**Supplementary Figure 1:** Gating strategies for identifying Treg subsets from lymphocyte populations.

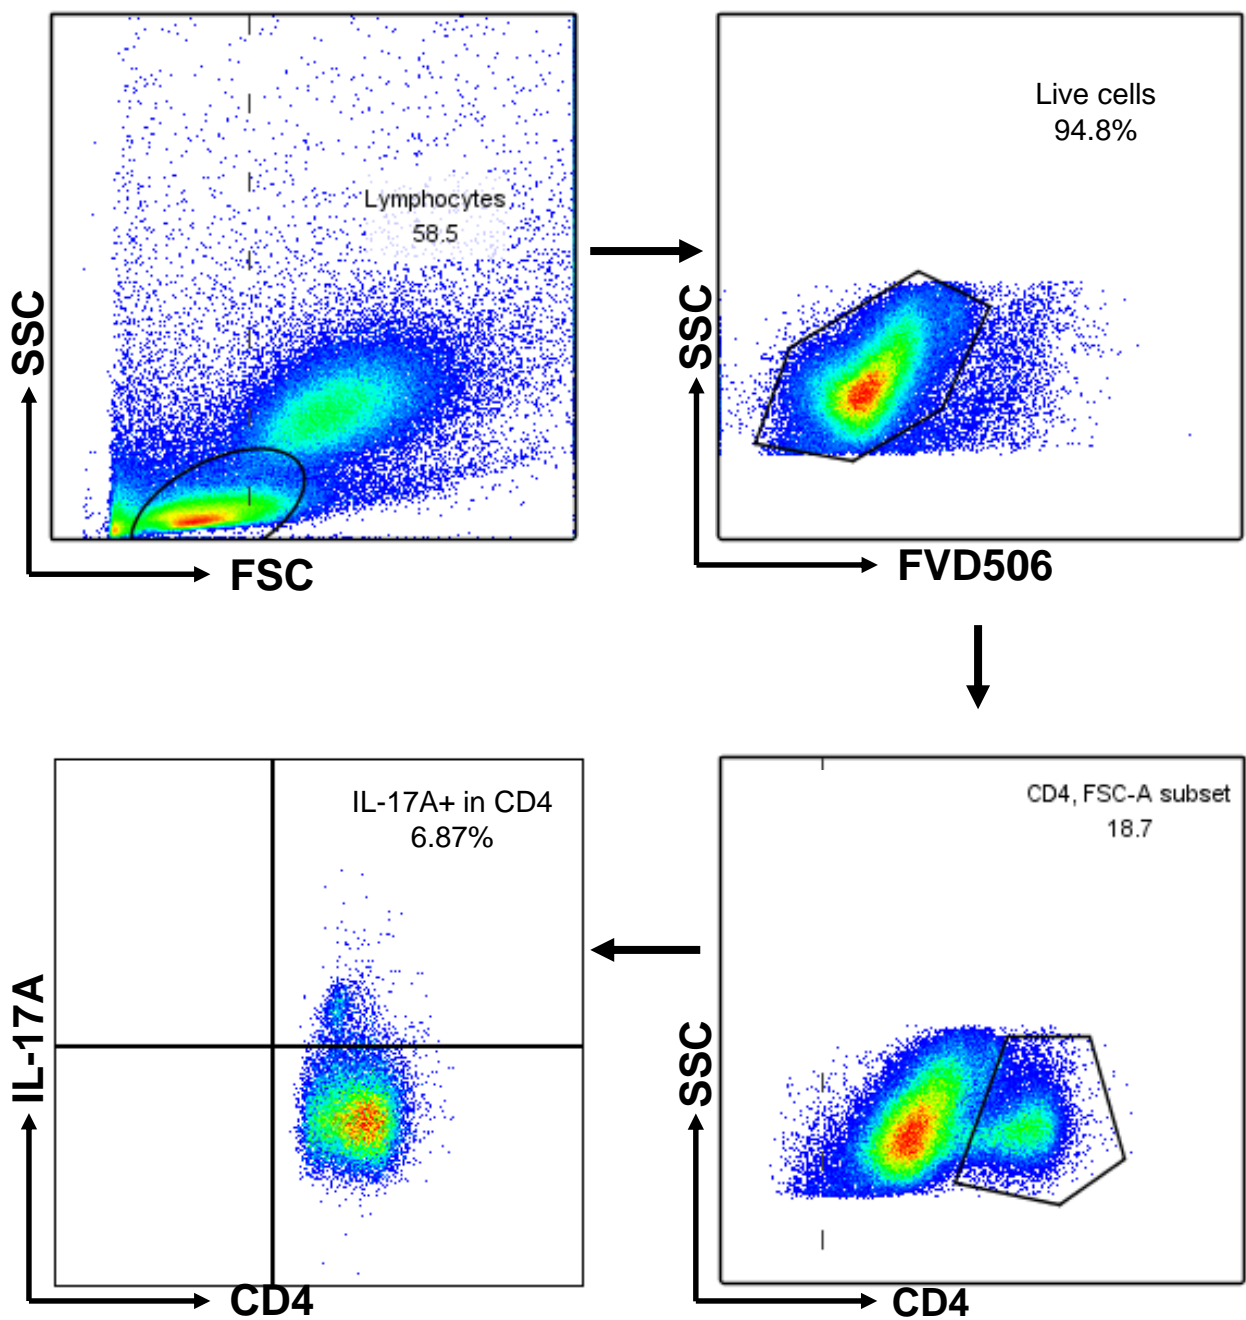

**Supplementary Figure 2:** Gating strategies for identifying Th17 subsets from lymphocyte populations.
